# Supplementary material for: High photocatalytic yield in the non-oxidative coupling of methane using a Pd–TiO2 nanomembrane gas flow-through reactor
Source: Royal Society of Chemistry journal article supplement (doi:10.1039/d4ey00112e), 2024-01-01
Supplement: d4ey00112e1.pdf [file d4ey00112e1.pdf]

## Supporting Information

### High photocatalytic yield in the non-oxidative coupling of methane using a Pd-TiO<sub>2</sub> nanomembrane gas flow-through reactor

Victor Longo<sup>a</sup>, Luana De Pasquale<sup>a</sup>, Francesco Tavella<sup>a</sup>, Mariam Barawi<sup>b</sup>, Miguel Gomez-Mendoza<sup>b</sup>, Víctor de la Peña O'Shea<sup>b</sup>, Claudio Ampelli<sup>a</sup>, Siglinda Perathoner<sup>a</sup>, Gabriele Centi<sup>a</sup> and Chiara Genovese<sup>a\*</sup>

<sup>a</sup> Department of Chemical, Biological, Pharmaceutical and Environmental Sciences and CASPE/INSTM

University of Messina Viale F. Stagno D'Alcontres 31, 98166 Messina (Italy)

<sup>b</sup> Photoactivated Processes Unit, IMDEA Energy, Avda. Ramón de la Sagra, 3, Móstoles, 28935, Madrid (Spain).

Madrid (Spain)

\*e-mail: chiara.genovese@unime.it .

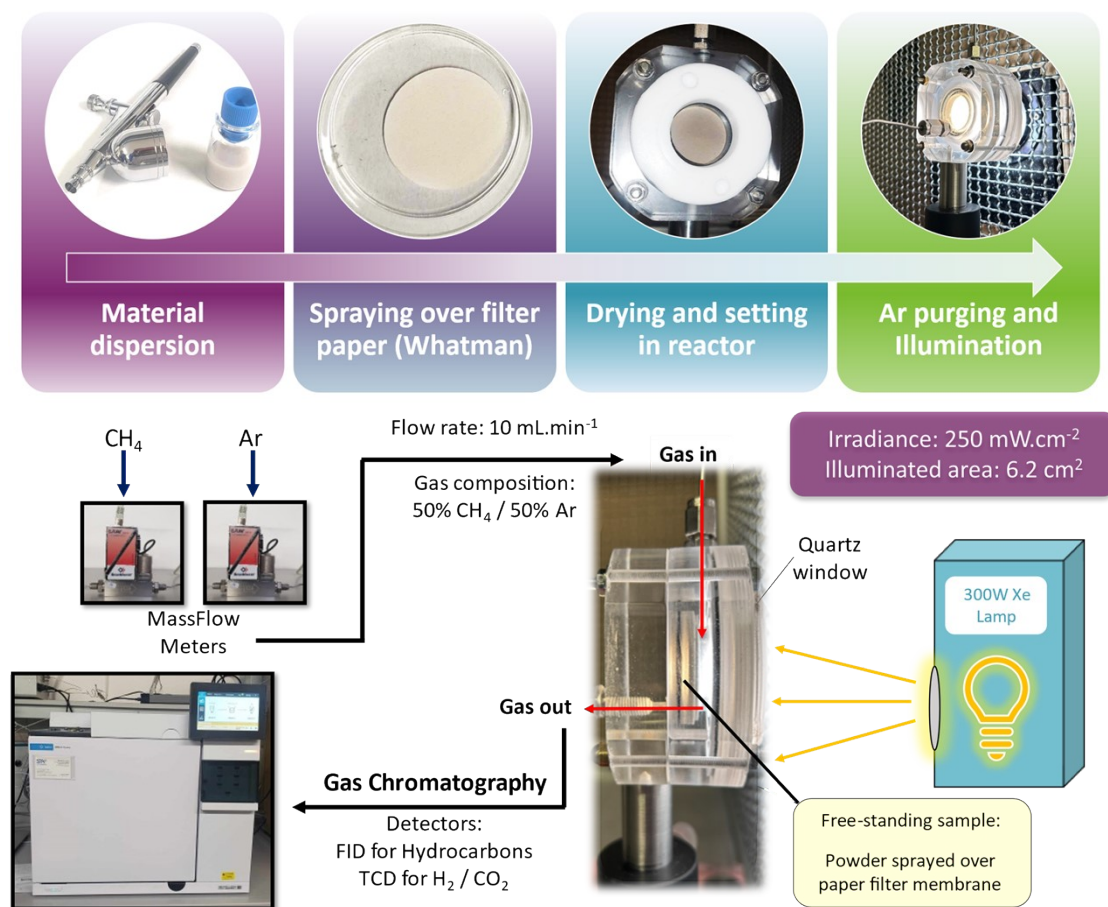

**Figure S1.** Scheme of photocatalytic membrane preparation and testing set-up.

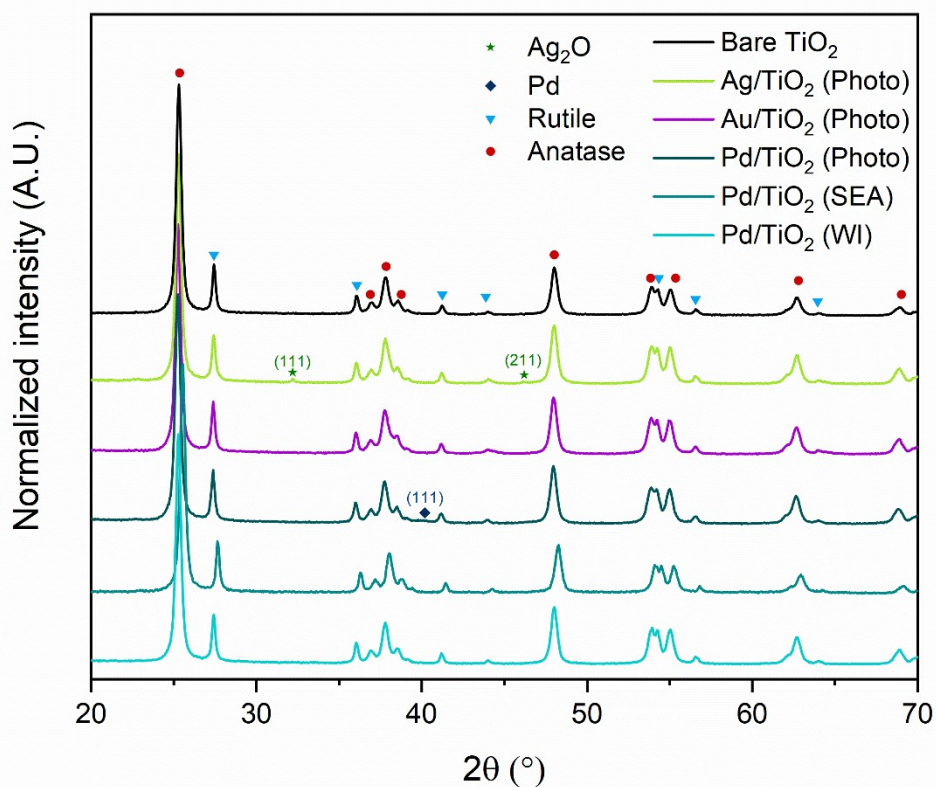

**Figure S2.** XRD patterns of all metal-loaded TiO<sub>2</sub> synthesised materials and bare TiO<sub>2</sub> P25 as reference.

The different peaks from the bare TiO<sub>2</sub> P25 support can be indexed to the rutile polymorph (JCDPS no 88-1175) for reflections at 27.42°, 36.08°, 41.25°, 44.03°, 54.33°, 56.57° and 63.44° corresponding to planes of Miller indices of (110), (101), (111), (210), (211), (220) and (002), respectively, and to the anatase polymorph (JCPDS no. 84-1286) for reflections at 25.64°, 37.27°, 38.14°, 38.90°, 48.40°, 54.22°, 55.36°, 62.99° and 69.07° corresponding to planes of Miller indices (101), (103), (004), (112), (200), (105), (211), (204) and (116) <sup>[1]</sup>

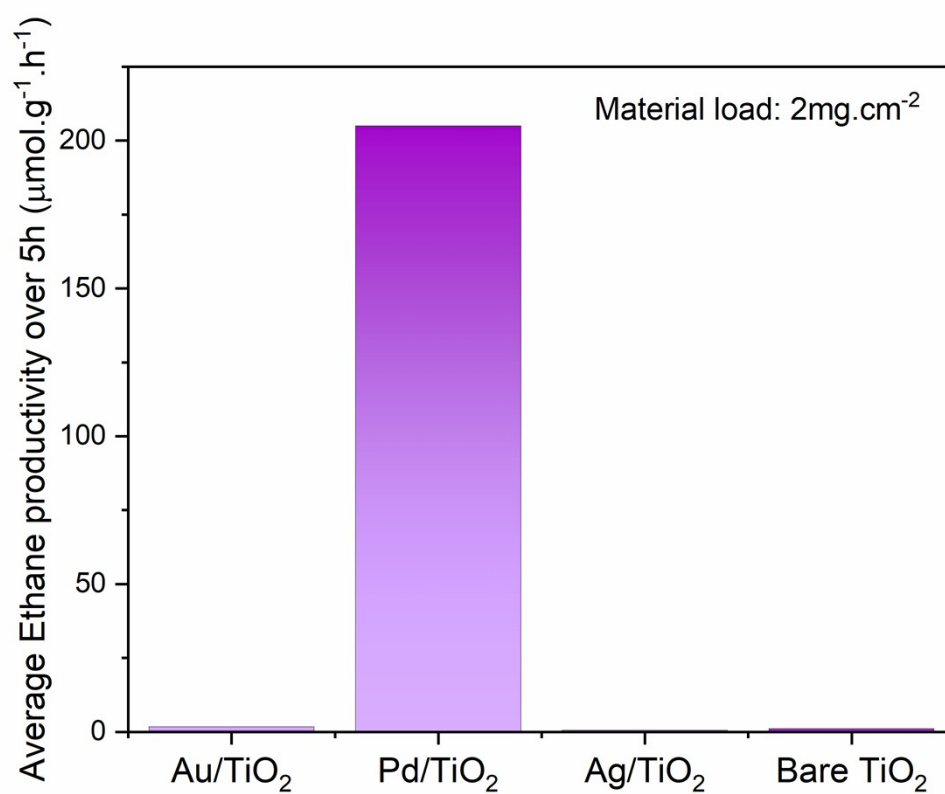

**Figure S3.** Ethane productivity for photocatalytic NOCM over Pd, Au and Ag on TiO<sub>2</sub> prepared by photo-deposition. Bare TiO<sub>2</sub> as reference. Reaction conditions: flow 0.6 l·h<sup>-1</sup>, CH<sub>4</sub> 50% in Ar, light irradiation for 5 hours

### Ethane and hydrogen productivities for Au/TiO<sub>2</sub> (photo) samples

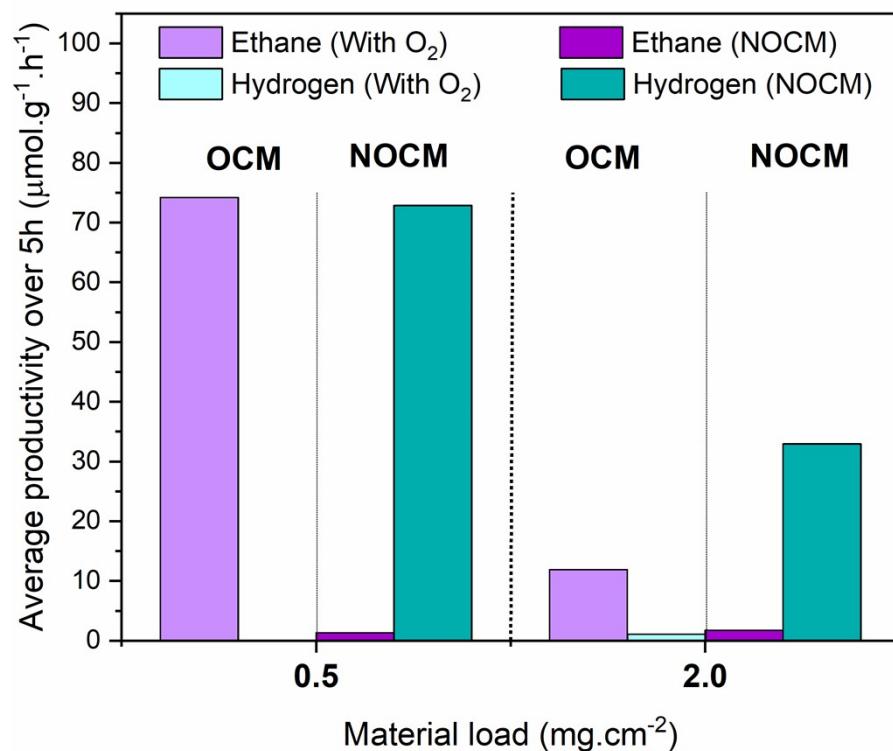

**Figure S4.** Average ethane and hydrogen productivity for aerobic and anaerobic photocatalytic reaction over Au/TiO<sub>2</sub> (photo) -0.5 and 2.0 mg cm<sup>-2</sup> loadings. Reaction conditions: flow 0.6 l.h<sup>-1</sup>, CH<sub>4</sub> 50% in Ar, light irradiation for 5 hours, for OCM 5000 ppm of O<sub>2</sub>, ratio CH<sub>4</sub>:O<sub>2</sub> = 100)

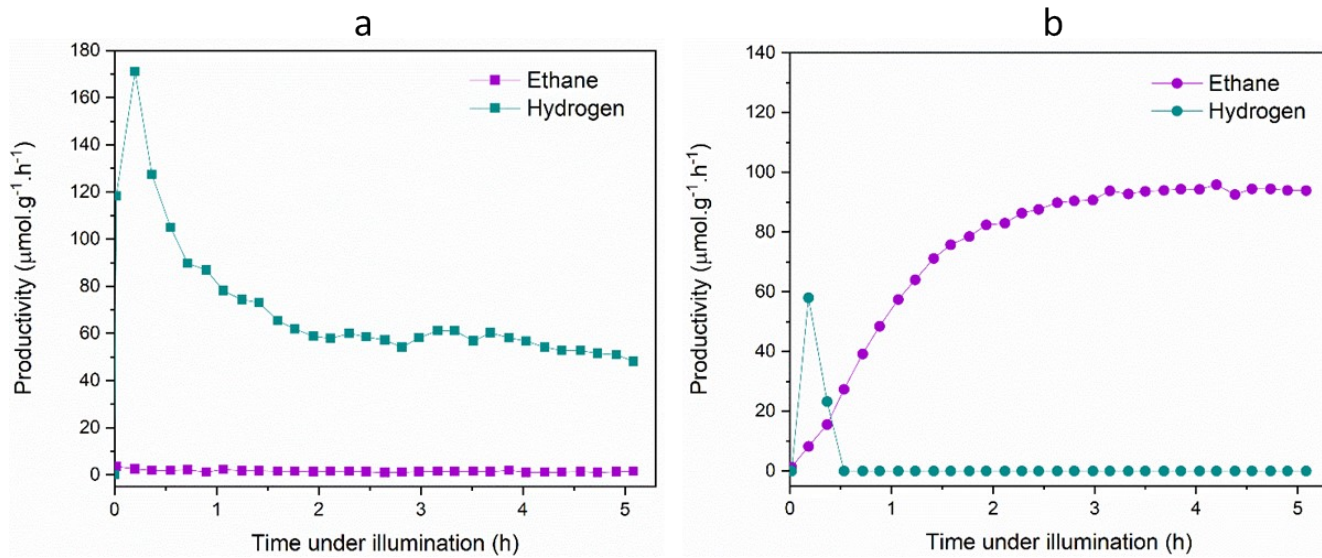

**Figure S5** Trends of ethane and hydrogen productivity for the sample Au/TiO<sub>2</sub> (photo) (loading 0.5mg. cm<sup>-2</sup>) in anaerobic (a) and aerobic (b) (5000ppm of O<sub>2</sub>, ratio CH<sub>4</sub>:O<sub>2</sub> = 100) conditions.

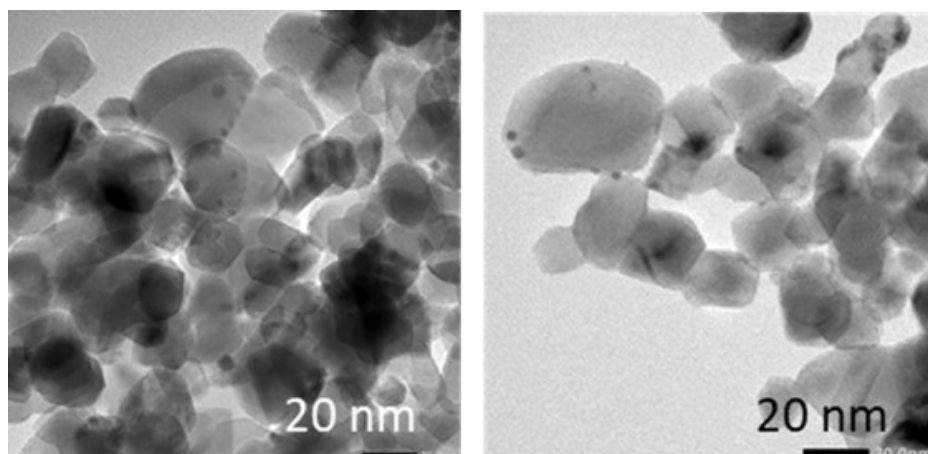

**Figure S6.** TEM images of Pd/TiO<sub>2</sub> sample prepared by photo deposition.

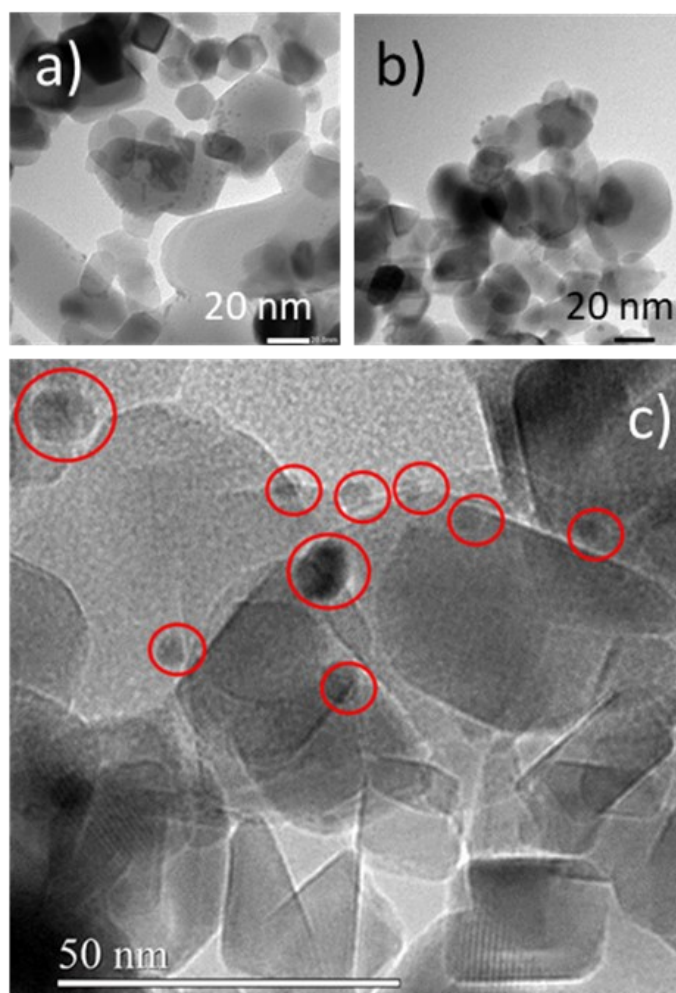

**Figure S7.** a, b) TEM c) HR-TEM image of Pd/TiO<sub>2</sub> sample prepared by impregnation (WI)

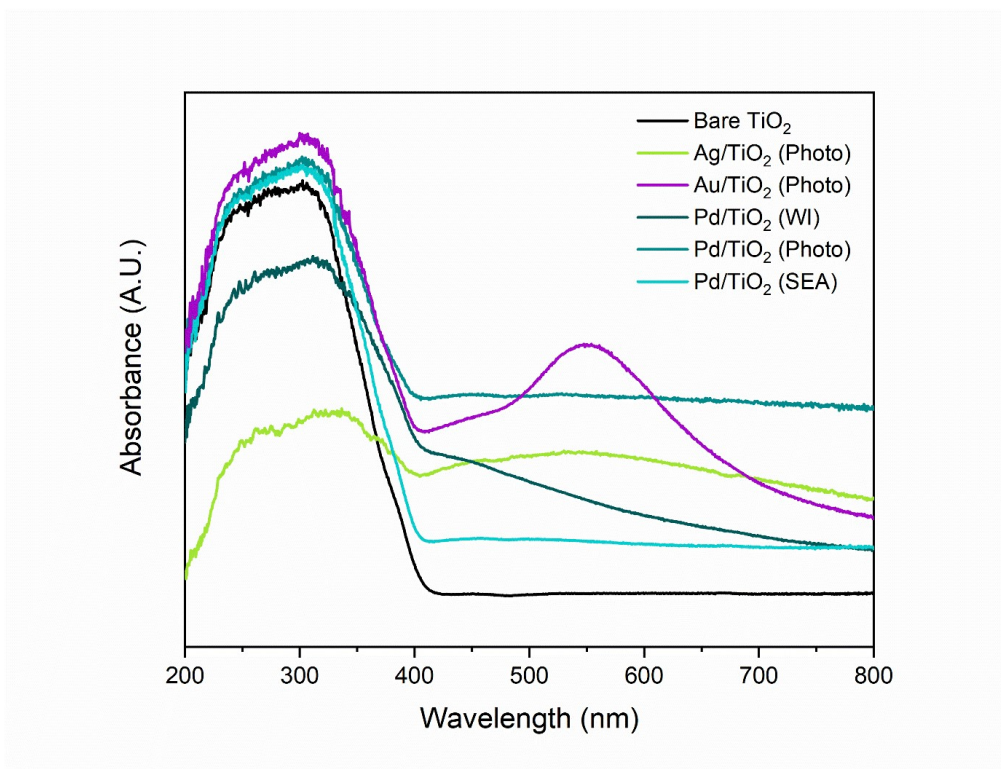

**Figure S8.** UV-vis spectra of metal loaded-TiO<sub>2</sub> samples and bare TiO<sub>2</sub> as reference

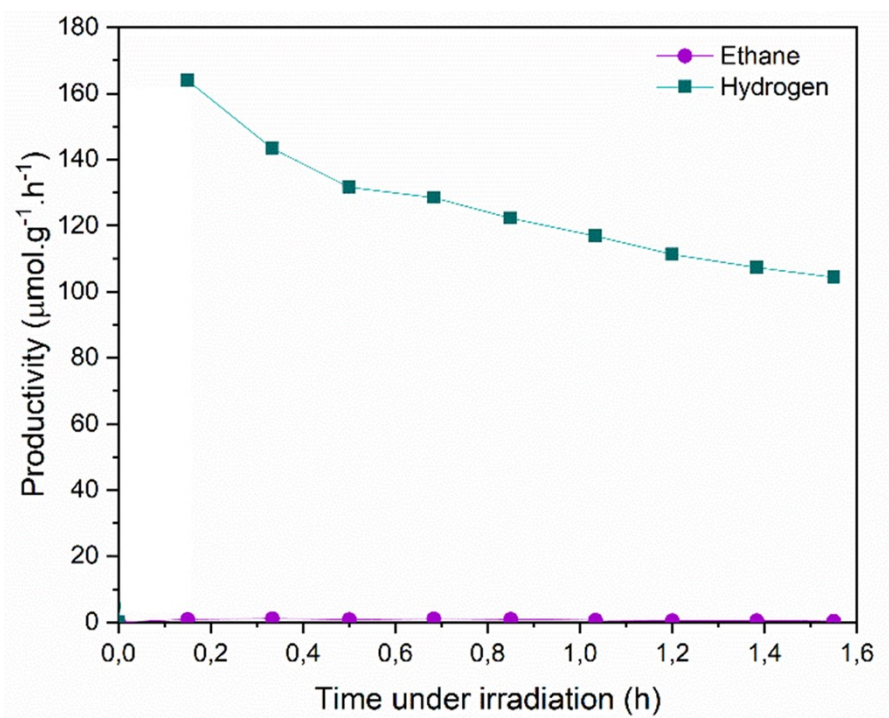

**Figure S9.** Blank test with Pd/TiO<sub>2</sub> (SEA) sample. Conditions: material loading: 1.0 mg.cm<sup>-2</sup>, Flow: 100% Ar, 5 ml.min<sup>-1</sup> for 5 hours of irradiation

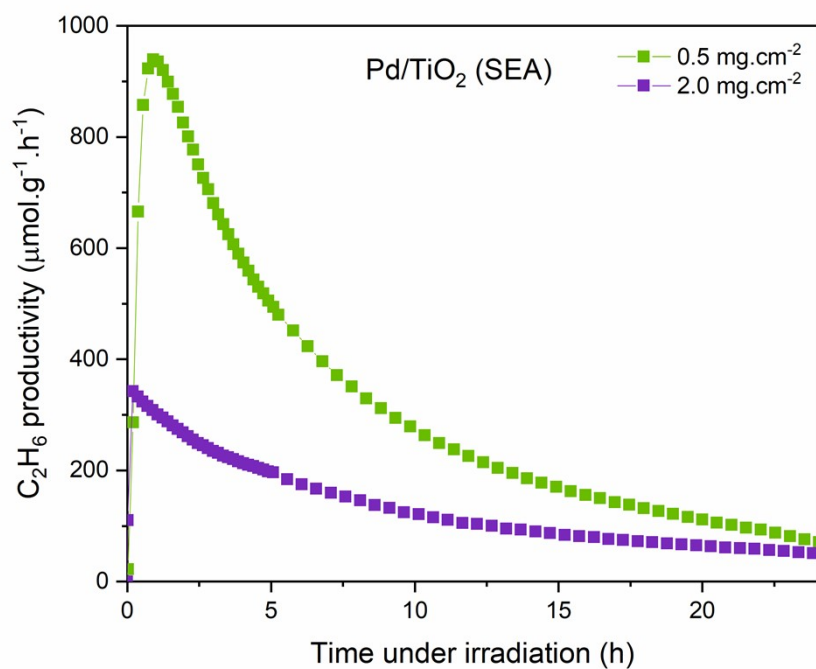

**Figure S10.** Ethane productivity for 24h of continuous NOCM photocatalytic test over Pd/TiO<sub>2</sub> (SEA) with loading of 0.5 and 2.0 mg.cm<sup>-2</sup>.

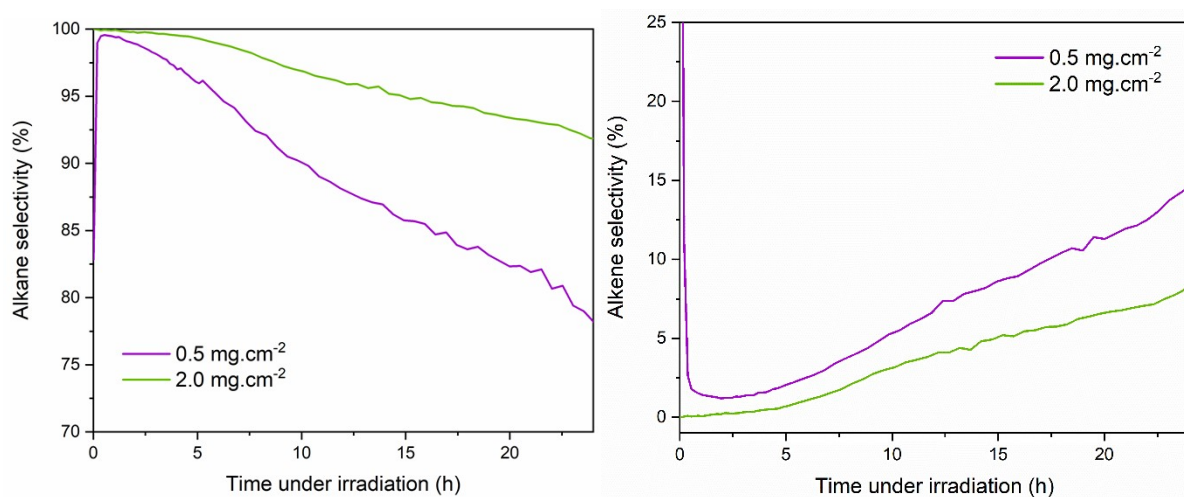

**Figure S11.** Alkane (ethane/propane) and alkene (ethylene/propylene) hydrocarbon selectivity for 24h of continuous NOCM photocatalytic test over Pd/TiO<sub>2</sub> (SEA) with loading of 0.5 and 2.0 mg.cm<sup>-2</sup>.



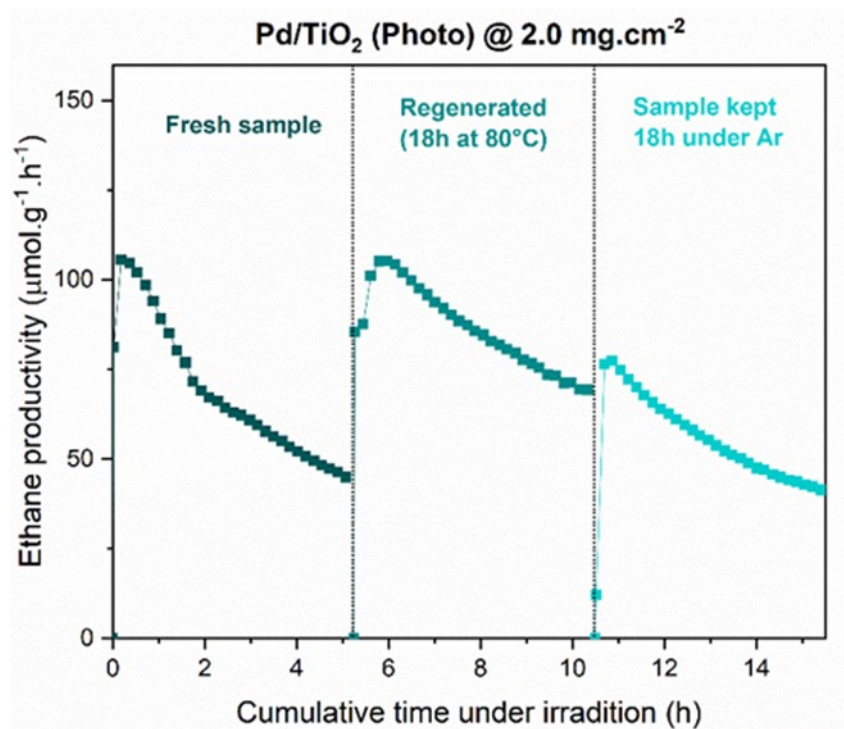

**Figure S12.** Regeneration cycles after 5h of photocatalytic test on samples Pd/TiO<sub>2</sub> (Photo) with 2.0 mg.cm<sup>-2</sup> in air at 80°C and Ar.

| Pd/TiO <sub>2</sub> (SEA) | Products Yield (μmol·g <sup>-1</sup> ) |          |         |           |
|---------------------------|----------------------------------------|----------|---------|-----------|
|                           | Ethane                                 | Ethylene | Propane | Propylene |
| Time                      |                                        |          |         |           |
| 5h                        | 3539                                   | 55,4     | 9,8     | 3,9       |
| 24h                       | 7382                                   | 290,1    | 25,5    | 31,3      |

**Table S1.** C-based products yield (μmol·g<sup>-1</sup>) for photocatalytic NOCM test over Pd/TiO<sub>2</sub> (SEA), 0.2% wt Pd loading. Reaction conditions: flow 0.6 L·h<sup>-1</sup>, CH<sub>4</sub> 50% in Ar, light irradiation for 5 hours and 24 hours.

### Calculation of selectivity.

Ethane selectivity was calculated according to Eq 1.

$$\text{Ethane selectivity} = \frac{2 \times [\text{Ethane}]}{2 \times [C_2] + 3 \times [C_3] + [CO_2]} \times 100 \text{ \#(Eq. 1)}$$

The alkane or alkene hydrocarbon selectivity was determined considering only the produced hydrocarbons as in Eq 2., and Eq 3.

$$\text{Alkane Selectivity (\%)} = \frac{2 \times [\text{Ethane}] + 3 \times [\text{Propane}]}{2 \times [\text{Ethane} + \text{Ethylene}] + 3 \times [\text{Propane} + \text{Propylene}]} \times 100 \text{ \#(Eq. 2)}$$

$$\text{Alkene Selectivity (\%)} = \frac{2 \times [\text{Ethylene}] + 3 \times [\text{Propylene}]}{2 \times [\text{Ethane} + \text{Ethylene}] + 3 \times [\text{Propane} + \text{Propylene}]} \times 100 \text{ \#(Eq. 3)}$$
